# Supplementary material
Source: publisher figshare collection journal article supplement (https://sage.figshare.com/ndownloader/files/14014421)
Supplement: Supplementary file 1 [file 14014421]

## Appendix A

### Short-form Moral Foundations Questionnaire items

#### **Judgment**

##### Harm

MF01 Compassion for those who are suffering is the most crucial virtue.

MF07 One of the worst things a person could do is hurt a defenseless animal.

##### Fairness

MF02 When the government makes laws, the number one principle should be ensuring that everyone is treated fairly.

MF08 Justice is the most important requirement for a society.

##### Loyalty

MF03 I am proud of my country's history.

MF09 People should be loyal to their family members, even when they have done something wrong.

##### Authority

MF04 Respect for authority is something all children need to learn.

MF10 Men and women each have different roles to play in society.

##### Purity

MF05 People should not do things that are disgusting, even if no one is harmed.

MF11 I would call some acts wrong on the grounds that they are unnatural.

#### **Relevance**

##### Harm

MF12 Whether or not someone suffered emotionally.

MF18 Whether or not someone cared for someone weak or vulnerable.

##### Fairness

MF13 Whether or not some people were treated differently than others.

MF19 Whether or not someone acted unfairly.

##### Loyalty

MF14 Whether or not someone's action showed love for his or her country.

MF20 Whether or not someone did something to betray his or her group.

##### Authority

MF15 Whether or not someone showed a lack of respect for authority.

MF21 Whether or not someone conformed to the traditions of society.

##### Purity

MF16 Whether or not someone violated standards of purity and decency.

MF22 Whether or not someone did something disgusting.

## Appendix B

## Results from Factorial ESEM in Set-1 countries

|                    | 1           | 2            | 3           | 4            | 5     |
|--------------------|-------------|--------------|-------------|--------------|-------|
| MF02 (FAIRLY)      | <b>.525</b> | -.089        | .371        | -.040        | .047  |
| MF08 (JUSTICE)     | <b>.518</b> | -.046        | .343        | .030         | .024  |
| MF01 (COMPASSION)  | <b>.422</b> | .162         | .409        | -.077        | -.023 |
| MF07 (ANIMAL)      | <b>.403</b> | -.032        | .386        | .006         | .020  |
| MF21 (TRADITIONS)  | -.096       | <b>1.001</b> | -.024       | .224         | .019  |
| MF22 (DISGUSTING)  | -.020       | <b>.904</b>  | -.007       | -.076        | .481  |
| MF11 (UNNATURAL)   | .217        | <b>.850</b>  | -.120       | .001         | .021  |
| MF10 (SEXROLES)    | .284        | <b>.847</b>  | -.175       | -.036        | .001  |
| MF14 (LOVECOUNTRY) | -.008       | <b>.795</b>  | .077        | .509         | -.164 |
| MF05 (HARMLESSDG)  | .459        | <b>.687</b>  | -.003       | .025         | .058  |
| MF16 (DECENCY)     | -.020       | <b>.666</b>  | .070        | .408         | .304  |
| MF03 (HISTORY)     | .420        | <b>.656</b>  | -.022       | .065         | -.021 |
| MF20 (BETRAY)      | .003        | <b>.568</b>  | .166        | .061         | .475  |
| MF09 (FAMILY)      | .258        | <b>.549</b>  | .032        | .030         | -.068 |
| MF12 (EMOTIONALLY) | -.171       | .058         | <b>.838</b> | -.011        | -.013 |
| MF13 (TREATED)     | -.056       | -.047        | <b>.785</b> | .087         | .065  |
| MF18 (WEAK)        | .024        | .234         | <b>.667</b> | -.010        | .033  |
| MF19 (UNFAIRLY)    | .067        | .008         | <b>.485</b> | -.028        | .446  |
| MF04 (KIDRESPECT)  | .480        | .208         | -.029       | <b>.577</b>  | -.071 |
| MF15 (AUTHORITY)   | .019        | -.001        | -.059       | <b>1.357</b> | .053  |

*Note.* These results were obtained from using Geomin rotation in Mplus and constraining factor loadings to be equal across countries (intercepts allowed to vary). Fit statistics for this model: CFI=.873, SRMR=.068, RMSEA=.061.
